# Supplementary material for: Joint angular excursions during cyclical behaviors differ between tetrapod feeding and locomotor systems
Source: Oxford University Press journal article supplement (doi:10.1242/jeb.200451), 2019-01-01
Supplement: jeb200451supp.pdf [file jeb200451supp.pdf]

Table S1. Summary statistics, data source, and average joint excursions observed within species.

| Group    | Species                        | Body mass | Treadmill | Gait type          | Data source                     | Individuals*           | Cycles*                | Jaw           | Shoulder     | Elbow | Wrist        | Hip           | Knee  | Ankle |
|----------|--------------------------------|-----------|-----------|--------------------|---------------------------------|------------------------|------------------------|---------------|--------------|-------|--------------|---------------|-------|-------|
| Urodela  | <i>Ambystoma tigrinum</i>      | 0.13      | -         | -                  | (Reilly and Lauder, 1990)       | 4                      | 42                     | 20.51 ± 1.98  | -            | -     | -            | -             | -     | -     |
|          | <i>Dicampodonte tenebrosus</i> | 0.07      | Yes       | Walk, Running trot | (Ashley-Ross, 1994)             | 5                      | 30                     | -             | -            | -     | -            | 60.30 ± 17.55 | -     | -     |
|          | <i>Taricha torosa</i>          | 0.01      | Yes       | Walk               | (Ashley-Ross et al., 2009)      | 5                      | 25                     | -             | 43.46        | 84.63 | 32.76        | 59.72         | 63.05 | 43.09 |
| Anura    | <i>Phyllomedusa azurea</i>     | 0.00      | No        | Walk               | (Herrel et al., 2013)           | R                      | R                      | -             | 90.50        | 97.18 | 76.54        | -             | -     | -     |
| Squamata | <i>Agama agama</i>             | 0.31      | -         | -                  | (Kraklauer, 1991)               | 4                      | 16                     | 30.00 ± 12.40 | -            | -     | -            | -             | -     | -     |
|          | <i>Agama stellio</i>           | 0.30      | -         | -                  | (Herrel et al., 1996)           | 2                      | 146                    | 32.00 ± 7.00  | -            | -     | -            | -             | -     | -     |
|          | <i>Amphibolurus barbatus</i>   | 0.69      | -         | -                  | (Throckmorton and Clarke, 1981) | 3                      | 29                     | 23.29 ± 3.69  | -            | -     | -            | -             | -     | -     |
|          | <i>Anolis carolinensis</i>     | 0.00      | No        | Running trot       | (Foster and Higham, 2012)       | S, W, H: 4; E, K, A: R | S, W, H: 5; E, K, A: R | -             | 88.96 ± 7.11 | 77.02 | 56.01 ± 8.81 | 31.23 ± 3.67  | 48.07 | 61.92 |

|                                  |      |     |              |                                                            |                           |                               |               |                |               |               |                |               |               |
|----------------------------------|------|-----|--------------|------------------------------------------------------------|---------------------------|-------------------------------|---------------|----------------|---------------|---------------|----------------|---------------|---------------|
| <i>Callisaurus draconoides</i>   | 0.01 | Yes | Running trot | (Irschick and Jayne, 1999)                                 | R                         | R                             | -             | 110.09         | 48.82         | 87.03         | 97.30          | 46.44         | 30.30         |
| <i>Cnemidophorus tigris</i>      | 0.02 | Yes | Running trot | (Irschick and Jayne, 1999)                                 | R                         | R                             | -             | 111.25         | 62.40         | 57.32         | 152.75         | 76.89         | 92.01         |
| <i>Cordylus warreni</i>          | 0.04 | No  | Running trot | this study                                                 | 4                         | 9                             | -             | 97.54 ± 17.33  | 34.03 ± 6.01  | 61.74 ± 22.40 | 109.60 ± 2.27  | 13.84 ± 8.08  | 72.38 ± 10.08 |
| <i>Dipsosaurus dorsalis</i>      | 0.07 | Yes | Running trot | (Irschick and Jayne, 1999; Schwenk and Throckmorton, 1989) | S, E, W, H, K, A; R; J: 2 | S, W, H: 4; E, K, A; R; J: 10 | 25.00 ± 4.00  | 76.76          | 69.26         | 41.34         | 114.37         | 35.77         | 37.84         |
| <i>Eublepharis macularius</i>    | 0.05 | No  | Running trot | (Fuller et al., 2011)                                      | R                         | R                             | -             | -              | -             | -             | -              | 73.98         | -             |
| <i>Iguana iguana</i>             | 3.18 | -   | -            | (Schwenk and Throckmorton, 1989)                           | 1                         | 4                             | 42.00 ± 10.00 | -              | -             | -             | -              | -             | -             |
| <i>Laudakia stellio</i>          | 0.05 | No  | Running trot | this study                                                 | 2                         | 15                            | -             | 133.62 ± 15.45 | 62.95 ± 10.30 | 62.38 ± 14.58 | 145.96 ± 11.59 | 98.23 ± 9.03  | 70.93 ± 13.43 |
| <i>Leiocephalus schreibersii</i> | 0.04 | No  | Running trot | this study                                                 | 2                         | 20                            | -             | 115.05 ± 26.72 | 5.94 ± 1.93   | 34.91 ± 12.80 | 129.77 ± 14.3  | 33.89 ± 14.30 | 79.35 ± 6.89  |
| <i>Moloch horridus</i>           | 0.05 | -   | -            | this study                                                 | 1                         | 9                             | 25.87 ± 2.70  | -              | -             | -             | -              | -             | -             |

|                                    |      |     |              |                                                            |                           |                             |              |                |               |              |                |               |               |
|------------------------------------|------|-----|--------------|------------------------------------------------------------|---------------------------|-----------------------------|--------------|----------------|---------------|--------------|----------------|---------------|---------------|
| <i>Oplurus cuvieri</i>             | 0.05 | No  | Running trot | (Delheusy and Bels, 1992)                                  | S, E, W, H, K, A: 3; J: 4 | S, E, W, H, K, A: 25; J: 60 | 31.56 ± 6.24 | 103.55 ± 36.90 | 54.37 ± 11.21 | 37.08 ± 3.52 | 116.77 ± 11.34 | 43.01 ± 14.73 | 81.81 ± 15.29 |
| <i>Phelsuma madagascariensis</i>   | 0.06 | -   | -            | (Delheusy and Bels, 1999)                                  | 4                         | 28                          | 39.78 ± 5.06 | -              | -             | -            | -              | -             | -             |
| <i>Phrynoscephalus helioscopus</i> | 0.06 | -   | -            | (Schwenk and Throckmorton, 1989)                           | 2                         | 8                           | 33.00 ± 8.00 | -              | -             | -            | -              | -             | -             |
| <i>Phrynosoma platyrhinos</i>      | 0.05 | Yes | Running trot | (Irschick and Jayne, 1999; Schwenk and Throckmorton, 1989) | S, E, W, H, K, A: R; J: 1 | S, E, W, H, K, A: 1; J: 5   | 32.00 ± 1.00 | 102.61         | 11.94         | 47.19        | 140.37         | 59.77         | 90.96         |
| <i>Pogona barbata</i>              | 0.59 | -   | -            | (Schwenk and Throckmorton, 1989)                           | 1                         | 6                           | 28.00 ± 4.00 | -              | -             | -            | -              | -             | -             |
| <i>Pogona henrylawsoni</i>         | 0.68 | -   | -            | this study                                                 | 1                         | 10                          | 30.16 ± 3.47 | -              | -             | -            | -              | -             | -             |
| <i>Sauromalus obesus</i>           | 0.90 | -   | -            | (Schwenk and Throckmorton, 1989)                           | 3                         | 10                          | 38.00 ± 7.00 | -              | -             | -            | -              | -             | -             |

|                               |      |     |              |                                  |                           |                           |              |                |               |               |                |               |                |
|-------------------------------|------|-----|--------------|----------------------------------|---------------------------|---------------------------|--------------|----------------|---------------|---------------|----------------|---------------|----------------|
| <i>Sceloporus clarkii</i>     | 0.03 | Yes | Walk         | (Reilly and Delancey, 1997)      | 2                         | 10                        | -            | -              | -             | -             | 39.50 ± 12.65  | 33.00 ± 12.65 | 120.50 ± 11.07 |
| <i>Teratoscincus scincus</i>  | 0.01 | No  | Running trot | (Fuller et al., 2011)            | R                         | R                         | -            | -              | -             | -             | -              | 60.00         | -              |
| <i>Trioceros jacksonii</i>    | 1.00 | -   | -            | (So et al., 1992)                | 3                         | 11                        | 37.60 ± 1.57 | -              | -             | -             | -              | -             | -              |
| <i>Tropidurus torquatus</i>   | 0.03 | No  | Running trot | this study                       | 3                         | 8                         | -            | 95.77 ± 13.21  | 43.13 ± 8.12  | 52.67 ± 15.68 | 141.17 ± 8.92  | 80.41 ± 3.41  | 68.37 ± 13.62  |
| <i>Tupinambis meriana</i>     | 6.80 | Yes | Walk         | (Sheffield et al., 2011)         | H, K, A: 3; J: 1          | H, K, A: 49; J: 30        | 20.86 ± 3.55 | -              | -             | -             | 80.00          | 54.16         | 51.08          |
| <i>Tupinambis teguixin</i>    | 6.80 | -   | -            | this study                       | 4                         | 42                        | 16.00 ± 1.00 | -              | -             | -             | -              | -             | -              |
| <i>Uma scoparia</i>           | 0.75 | Yes | Running trot | (Irschick and Jayne, 1999)       | S, E, W, H, K, A: R; J: 1 | S, E, W, H, K, A: R; J: 7 | 29.11 ± 4.81 | 74.36          | 15.52         | 59.33         | 107.19         | 50.77         | 30.24          |
| <i>Uromastix acanthinurus</i> | 1.50 | -   | -            | (Herrel and Vree, 1999)          | 4                         | 31                        | 26.48 ± 5.47 | -              | -             | -             | -              | -             | -              |
| <i>Uromastix aegyptius</i>    | 1.50 | -   | -            | (Schwenk and Throckmorton, 1989) | 4                         | 8                         | 23.00 ± 2.00 | -              | -             | -             | -              | -             | -              |
| <i>Varanus</i>                | 5.00 | No  | Running trot | (Elias et al., 2000)             | S, E, W, H,               | S, E, W, H, K, A:         | 15.00 ± 2.00 | 105.96 ± 21.95 | 43.12 ± 16.29 | 55.73 ± 14.99 | 115.73 ± 15.99 | 69.00 ± 12.84 | 71.40 ± 17.17  |

|            |                                    |        |     |                   |                                                  |               |                    |              |               |               |   |               |               |               |
|------------|------------------------------------|--------|-----|-------------------|--------------------------------------------------|---------------|--------------------|--------------|---------------|---------------|---|---------------|---------------|---------------|
| Testudines | <i>exanthe maticus</i>             |        |     |                   |                                                  | K, A: 2; J: 4 | 13; J: 29          |              |               |               |   |               |               |               |
|            | <i>Terrepe ne carolina</i>         | 0.36   | -   | -                 | (Bels et al., 1997)                              | 3             | 61                 | 46.29 ± 1.37 | -             | -             | - | -             | -             | -             |
|            | <i>Trache mys scripta</i>          | 0.24   | Yes | Walk              | (Rivera and Blob, 2010)                          | 7             | 123                | -            | 85.00 ± 2.30  | 52.00 ± 1.10  | - | -             | -             | -             |
| Crocodilia | <i>Alligato r mississi piensis</i> | 181.44 | Yes | Walk              | (Baier and Gatesy, 2013; Reilly and Elias, 1998) | 3             | S, E: 20; H, A: 60 | -            | 52.00 ± 12.00 | 73.00 ± 23.00 | - | 77.00 ± 15.49 | -             | 63.75 ± 13.56 |
|            | <i>Caiman crocodi lus</i>          | 30.00  | -   | -                 | (Cleure n and de Vree, 1992)                     | 3             | 29                 | 35.12 ± 8.46 | -             | -             | - | -             | -             | -             |
| Aves       | <i>Anas platyrh ynchos</i>         | 1.36   | -   | -                 | (Dawso n et al., 2011)                           | 3             | 242                | 11.91 ± 1.88 | -             | -             | - | -             | -             | -             |
|            | <i>Coturni x japonic a</i>         | 0.09   | Yes | Walk, Bipedal run | (Reilly, 2000)                                   | 5             | 60                 | -            | -             | -             | - | 1.67 ± 15.49  | 61.33 ± 18.07 | 61.33 ± 18.07 |
|            | <i>Numida meleag ris</i>           | 1.32   | Yes | Walk              | (Kambi c et al., 2015)                           | 1             | 15                 | -            | -             | -             | - | 24.27 ± 5.38  | 90.69 ± 6.69  | 74.38 ± 6.84  |
|            | <i>Pica pica</i>                   | 0.23   | No  | Walk, Bipedal run | (Versta ppen et al., 2000)                       | 3             | K: 20; A: 28       | -            | -             | -             | - | -             | 13.00 ± 14.50 | 33.00 ± 10.00 |

|                            |                              |        |                    |                        |                          |    |     |               |               |               |               |              |               |               |
|----------------------------|------------------------------|--------|--------------------|------------------------|--------------------------|----|-----|---------------|---------------|---------------|---------------|--------------|---------------|---------------|
| Mammalia                   | <i>Struthio camelus</i>      | 100.00 | No                 | Bipedal run            | (Smith et al., 2010)     | R  | 3   | -             | -             | -             | -             | 12.09 ± 4.44 | 32.39 ± 6.45  | 78.95 ± 8.04  |
|                            | <i>Vanellus vanellus</i>     | 0.25   | Yes                | Walk, Bipedal run      | (Nyakatura et al., 2012) | 4  | 6   | -             | -             | -             | -             | 32.40 ± 8.24 | 62.59 ± 10.84 | 75.06 ± 12.52 |
|                            | <i>Acinonyx jubatus</i>      | 53.50  | No                 | Walk                   | this study               | 2  | 12  | -             | 57.93 ± 18.61 | 8.28 ± 5.21   | 28.51 ± 9.32  | 54.25 ± 7.81 | 8.20 ± 4.78   | 18.06 ± 12.34 |
|                            | <i>Aotus nancymae</i>        | 0.77   | No                 | Walk                   | this study               | 3  | 35  | -             | 82.96 ± 17.96 | 34.83 ± 11.06 | 62.66 ± 5.12  | 78.64 ± 7.38 | 18.39 ± 2.62  | 4.01 ± 1.22   |
|                            | <i>Aplodontia rufa</i>       | 1.13   | -                  | -                      | (Druzinsky, 1995)        | 6  | 100 | 23.70 ± 4.17  | -             | -             | -             | -            | -             | -             |
|                            | <i>Arctictis binturong</i>   | 11.50  | No                 | Walk                   | this study               | 5  | 21  | -             | 92.26 ± 13.22 | 52.29 ± 6.22  | 45.55 ± 12.12 | 83.38 ± 4.32 | 42.08 ± 6.32  | 81.10 ± 11.23 |
|                            | <i>Camelus dromedarius</i>   | 408.23 | No                 | Walk                   | this study               | 2  | 14  | -             | 23.14 ± 14.34 | 14.87 ± 4.32  | 21.98 ± 12.35 | 50.32 ± 7.78 | 5.04 ± 3.68   | 25.45 ± 17.21 |
|                            | <i>Capra aegagrus hircus</i> | 45.36  | -                  | -                      | (Musinsky, 2012)         | R  | 9   | 13.93 ± 1.56  | -             | -             | -             | -            | -             | -             |
|                            | <i>Caracal caracal</i>       | 16.00  | No                 | Walk, Running trot     | this study               | 2  | 24  | -             | 77.71 ± 16.78 | 27.49 ± 2.48  | 17.20 ± 9.45  | 72.59 ± 3.69 | 54.79 ± 9.21  | 79.65 ± 17.21 |
|                            | <i>Cebus capucinus</i>       | 3.08   | No                 | Walk                   | this study               | 3  | 9   | -             | 71.32 ± 21.35 | 29.88 ± 5.66  | 43.15 ± 9.67  | 50.71 ± 4.71 | 32.92 ± 6.67  | 38.31 ± 8.23  |
| <i>Cheirogaleus medius</i> | 0.28                         | No     | Walk, Running trot | this study             | 2                        | 27 | -   | 92.97 ± 19.02 | 23.33 ± 9.27  | 79.00 ± 6.76  | 80.77 ± 8.67  | 10.25 ± 6.51 | 24.44 ± 10.63 |               |
| <i>Dasyurus byrnei</i>     | 0.10                         | No     | Walk, Running trot | (Fischer et al., 2002) | 2                        | 19 | -   | 29.00 ± 7.00  | 37.00 ± 8.50  | 53.00 ± 8.16  | 46.00 ± 10.33 | 25.00 ± 6.66 | 34.00 ± 9.00  |               |

|                                     |        |     |                    |                                                                                                           |                           |                                          |              |               |              |               |              |              |               |
|-------------------------------------|--------|-----|--------------------|-----------------------------------------------------------------------------------------------------------|---------------------------|------------------------------------------|--------------|---------------|--------------|---------------|--------------|--------------|---------------|
| <i>Daubentonia madagascariensis</i> | 2.94   | No  | Walk               | this study                                                                                                | 3                         | 30                                       | -            | 83.26 ± 15.70 | 38.60 ± 8.59 | 54.44 ± 9.90  | 74.35 ± 6.25 | 34.66 ± 8.15 | 33.22 ± 8.42  |
| <i>Didelphis virginiana</i>         | 2.31   | No  | Walk               | (Hiemae and Crompton, 1971; Jenkins, 1971) (Bonin et al., 2007; Hodson et al., 2000; Hodson et al., 2001) | S, H: 3; J: R             | H, S: R; J: 12                           | 33.67 ± 5.77 | 53.37         | -            | -             | 58.59        | -            | -             |
| <i>Equus ferus caballus</i>         | 816.47 | No  | Walk               | (Hodson et al., 2000; Hodson et al., 2001)                                                                | S, E, W, H, K, A: R; J: 4 | S, E, W, H, K, A: R; J: 24               | 3.22 ± 0.32  | 28.39         | 9.32         | 17.66         | 60.28        | 34.57        | 46.50         |
| <i>Erythrocebus patas</i>           | 9.45   | No  | Walk               | this study                                                                                                | 1                         | 8                                        | -            | 77.89 ± 15.43 | 14.42 ± 5.32 | 48.80 ± 11.32 | 74.94 ± 9.12 | 32.01 ± 4.89 | 26.05 ± 13.80 |
| <i>Eulemur fulvus</i>               | 2.21   | Yes | Walk               | (Schmidt, 2005a)                                                                                          | 2                         | S: 60; E: 35; W: 30; H: 31; K: 28; A: 20 | -            | 84.00 ± 9.00  | 60.00 ± 7.00 | 61.00 ± 8.00  | 92.00 ± 6.00 | 60.00 ± 6.00 | 51.00 ± 9.00  |
| <i>Felis catus</i>                  | 3.50   | No  | Walk               | (Thexton et al., 1980); this study                                                                        | S, E, W, H, K, A: 3; J: 5 | S, E, W, H, K, A: 15; J: 31              | 21.43 ± 7.85 | 66.29 ± 6.23  | 46.28 ± 5.44 | 76.32 ± 12.78 | 74.20 ± 9.76 | 47.30 ± 6.32 | 66.27 ± 14.32 |
| <i>Galea musteloides</i>            | 0.50   | Yes | Walk, Running trot | (Fischer et al., 2002)                                                                                    | 2                         | S: 27; E, W: 26; H: 47; K:               | -            | 23.00 ± 3.67  | 42.00 ± 3.00 | 37.00 ± 3.83  | 75.00 ± 4.83 | 28.00 ± 6.83 | 53.00 ± 6.66  |

|                                               |         |    |                    |                    |                           |                                 |              |               |               |               |                |              |               |  |
|-----------------------------------------------|---------|----|--------------------|--------------------|---------------------------|---------------------------------|--------------|---------------|---------------|---------------|----------------|--------------|---------------|--|
|                                               |         |    |                    |                    |                           | 74; A:<br>72                    |              |               |               |               |                |              |               |  |
| <i>Gazella spekei</i>                         | 20.00   | No | Walk               | this study         | 5                         | 20                              | -            | 23.87 ± 17.90 | 33.23 ± 5.21  | 23.58 ± 8.68  | 60.13 ± 9.23   | 31.58 ± 5.34 | 20.99 ± 11.21 |  |
| <i>Giraffa reticulata</i>                     | 1192.00 | No | Walk               | this study         | 3                         | 16                              | -            | 45.47 ± 19.43 | 25.95 ± 12.23 | 8.50 ± 13.21  | 53.40 ± 7.35   | 2.04 ± 4.42  | 3.89 ± 2.67   |  |
| <i>Hapale murgriseus</i>                      | 0.94    | No | Walk               | this study         | 2                         | 17                              | -            | 73.38 ± 24.54 | 39.05 ± 9.72  | 48.04 ± 5.27  | 58.84 ± 6.35   | 25.78 ± 6.61 | 43.95 ± 1.44  |  |
| <i>Hetero hyrax brucei</i>                    | 1.20    | No | Walk               | (Jenkins, 1971)    | 3                         | U                               | -            | 63.25         | -             | -             | 69.02          | -            | -             |  |
| <i>Homo sapiens</i>                           | 80.70   | No | Walk               | this study         | H, K, A: 6; J: 5          | H, K, A: 269; J: 351            | 6.01 ± 1.68  | -             | -             | -             | 42.34 ± 4.98   | 65.45 ± 3.78 | 51.23 ± 7.73  |  |
| <i>Lemur catta</i>                            | 2.21    | No | Walk               | this study         | 3                         | 30                              | -            | 67.91 ± 6.08  | 19.94 ± 4.38  | 49.96 ± 8.73  | 65.40 ± 8.07   | 25.19 ± 6.10 | 28.43 ± 9.87  |  |
| <i>Leopardus pardalis</i>                     | 13.61   | No | Walk, Running trot | this study         | 1                         | 12                              | -            | 81.79 ± 12.43 | 40.12 ± 6.32  | 65.01 ± 16.32 | 82.00 ± 10.43  | 56.22 ± 9.54 | 61.46 ± 15.32 |  |
| <i>Leptailurus serval</i>                     | 11.79   | No | Walk, Running pace | this study         | 2                         | 15                              | -            | 76.72 ± 19.21 | 40.79 ± 8.32  | 30.45 ± 12.32 | 70.67 ± 11.30  | 26.77 ± 3.28 | 9.44 ± 6.23   |  |
| <i>Loris tardigradus</i>                      | 2.21    | No | Walk               | this study         | 2                         | 31                              | -            | 95.32 ± 12.10 | 59.71 ± 8.98  | 75.94 ± 13.64 | 113.67 ± 14.27 | 60.82 ± 2.72 | 28.42 ± 10.29 |  |
| <i>Loxodonta africana and Elephas maximus</i> | 5443.11 | No | Walk               | (Ren et al., 2008) | 15                        | S, E: 8; W: 14; H, K: 21; A: 18 | -            | 44.00 ± 5.66  | 36.00 ± 2.83  | 66.00 ± 3.74  | 29.00 ± 4.58   | 42.00 ± 4.58 | 30.00 ± 4.24  |  |
| <i>Macaca mulatta</i>                         | 9.90    | No | Walk, Running trot | this study         | S, E, W, H, K, A: 2; J: 4 | S, E, W, H, K, A:               | 15.74 ± 4.83 | 94.71 ± 14.63 | 37.09 ± 2.98  | 76.02 ± 5.57  | 82.11 ± 5.50   | 40.76 ± 4.50 | 31.97 ± 12.60 |  |



|                                            |       |     |                           |                                       |                  | 16; J:<br>5,769                              |                 |                  |                  |                  |                   |                  |                  |   |
|--------------------------------------------|-------|-----|---------------------------|---------------------------------------|------------------|----------------------------------------------|-----------------|------------------|------------------|------------------|-------------------|------------------|------------------|---|
| <i>Mandri<br/>llus<br/>sphinx</i>          | 22.25 | -   | -                         | this<br>study                         | 2                | 41                                           | 21.80 ±<br>3.62 | -                | -                | -                | -                 | -                | -                | - |
| <i>Marmot<br/>a<br/>monax</i>              | 3.90  | -   | -                         | (Druzin<br>sky,<br>1995)              | 4                | 50                                           | 23.80 ±<br>5.83 | -                | -                | -                | -                 | -                | -                | - |
| <i>Martes<br/>flavigul<br/>a</i>           | 2.50  | No  | Walk                      | (Larson<br>et al.,<br>2001)           | U                | 2                                            | -               | -                | -                | -                | 67.46             | -                | -                | - |
| <i>Mesocr<br/>icetus<br/>auratus</i>       | 0.10  | No  | Walk                      | (Jenkin<br>s, 1971)                   | 3                | U                                            | 6.97 ±<br>1.76  | 54.64            | -                | -                | 58.54             | -                | -                | - |
| <i>Microc<br/>ebus<br/>murinu<br/>s</i>    | 0.12  | No  | Walk                      | (Schmi<br>dt,<br>2005a)               | 2                | S, H,<br>K: 75;<br>E: 74;<br>W: 63;<br>A: 67 | -               | 49.00 ±<br>8.00  | 40.00 ±<br>8.00  | 76.00 ±<br>9.00  | 75.00 ±<br>7.00   | 30.00 ±<br>7.00  | 36.00 ±<br>9.00  | - |
| <i>Mirza<br/>coquere<br/>li</i>            | 0.31  | No  | Walk,<br>Runnin<br>g trot | this<br>study                         | 2                | 16                                           | -               | 83.21 ±<br>21.88 | 66.69 ±<br>5.40  | 75.08 ±<br>1.21  | 121.29<br>± 14.70 | 72.40 ±<br>10.46 | 38.39 ±<br>8.84  | - |
| <i>Monod<br/>elphis<br/>domesti<br/>ca</i> | 0.11  | No  | Walk,<br>Runnin<br>g trot | (Fische<br>r et al.,<br>2002)         | 2                | S, E,<br>W, H,<br>K: 16;<br>A: 13            | -               | 47.00 ±<br>5.33  | 41.00 ±<br>5.00  | 71.00 ±<br>15.00 | 86.00 ±<br>5.50   | 44.00 ±<br>5.00  | 66.00 ±<br>11.66 | - |
| <i>Mustela<br/>putoriu<br/>s</i>           | 0.90  | No  | Walk                      | (Davis,<br>2014;<br>Jenkins,<br>1971) | S, H: 3;<br>J: 4 | S, H:<br>U; J: 64                            | 13.70 ±<br>3.56 | 62.24            | -                | -                | 82.03             | -                | -                | - |
| <i>Myotis<br/>lucifug<br/>us</i>           | 0.01  | -   | -                         | (Kallen<br>and<br>Gans,<br>1972)      | 25               | 6                                            | 17.82 ±<br>4.01 | -                | -                | -                | -                 | -                | -                | - |
| <i>Nasua<br/>narica</i>                    | 4.00  | No  | Walk                      | this<br>study                         | 2                | 45                                           | -               | 74.97 ±<br>15.33 | 33.75 ±<br>17.20 | 16.85 ±<br>5.56  | 78.64 ±<br>14.59  | 19.68 ±<br>3.82  | 15.81 ±<br>6.35  | - |
| <i>Ochoto<br/>na</i>                       | 0.25  | Yes | Walk,<br>Runnin<br>g trot | (Fische<br>r et al.,<br>2002)         | 2                | 29                                           | -               | -                | -                | -                | 49.00 ±<br>5.17   | 21.00 ±<br>3.83  | 30.00 ±<br>3.66  | - |

|                                   |        |     |                    |                                     |                           |                                    |              |               |              |               |               |               |               |
|-----------------------------------|--------|-----|--------------------|-------------------------------------|---------------------------|------------------------------------|--------------|---------------|--------------|---------------|---------------|---------------|---------------|
| <i>Oryctolagus cuniculus</i>      | 0.25   | -   | -                  | (Morimoto et al., 1985)             | 4                         | 400                                | 12.08 ± 3.64 | -             | -            | -             | -             | -             | -             |
| <i>Ovis aries</i>                 | 23.80  | Yes | Walk               | (Safayi et al., 2015)               | 17                        | 150                                | -            | -             | -            | -             | -             | -             | 36.00 ± 5.30  |
| <i>Pan paniscus</i>               | 38.20  | No  | Walk               | (D'Août et al., 2002)               | 9                         | 33                                 | -            | -             | -            | -             | 53.10 ± 15.00 | 67.30 ± 11.70 | 39.20 ± 9.20  |
| <i>Pan troglodytes</i>            | 53.00  | Yes | Walk, Running trot | (Pontzer et al., 2014)              | 4                         | 4                                  | -            | 26.26 ± 11.39 | 12.67 ± 8.75 | 10.81 ± 3.27  | 17.77 ± 8.17  | 31.53 ± 10.95 | 23.89 ± 7.11  |
| <i>Panthera tigris</i>            | 103.00 | No  | Walk               | this study                          | 4                         | 32                                 | -            | 73.91 ± 13.32 | 23.47 ± 2.12 | 65.22 ± 9.53  | 73.93 ± 4.32  | 9.37 ± 4.23   | 11.72 ± 7.32  |
| <i>Papio anubis</i>               | 19.20  | No  | Walk               | this study                          | 2                         | S, E, W, H, K, A: 8; J: 5,764      | 14.87 ± 5.17 | 69.05 ± 20.67 | 20.98 ± 2.79 | 56.76 ± 7.34  | 74.28 ± 5.21  | 22.78 ± 2.15  | 32.52 ± 6.89  |
| <i>Phascogale arctos cinereus</i> | 9.30   | No  | Walk               | (Larson et al., 2001)               | U                         | 9                                  | -            | -             | -            | -             | 58.40         | -             | -             |
| <i>Pongo pygmaeus</i>             | 57.00  | No  | Walk               | (Larson et al., 2001)               | U                         | 9                                  | -            | -             | -            | -             | 69.97         | -             | -             |
| <i>Potos flavus</i>               | 3.75   | No  | Walk, Running trot | (Davis, 2014); this study           | 2                         | S, E, W, H, K, A: 72; J: 50        | 15.70 ± 4.54 | 86.42 ± 17.36 | 62.38 ± 2.53 | 50.79 ± 13.16 | 72.37 ± 5.17  | 19.06 ± 6.35  | 35.14 ± 8.42  |
| <i>Procavia capensis</i>          | 4.00   | Yes | Walk, Running trot | (Fischer et al., 2002; Janis, 1979) | S, E, W, H, K, A: 2; J: U | S, E: 44; W: 39; H, K, A: 21; J: 4 | 24.01 ± 4.02 | 30.00 ± 7.00  | 45.00 ± 9.50 | 25.00 ± 6.83  | 70.00 ± 8.33  | 45.00 ± 5.50  | 60.00 ± 12.33 |

|                              |      |     |                    |                                                  |                           |                                          |              |               |               |               |               |              |              |
|------------------------------|------|-----|--------------------|--------------------------------------------------|---------------------------|------------------------------------------|--------------|---------------|---------------|---------------|---------------|--------------|--------------|
| <i>Procyon lotor</i>         | 6.50 | Yes | Walk               | (Jenkins and Camazine, 1977)                     | 3                         | 7                                        | -            | -             | -             | -             | 71.60 ± 6.30  | -            | -            |
| <i>Propithecus coquereli</i> | 4.38 | No  | Walk               | this study                                       | 3                         | 30                                       | -            | 58.37 ± 9.66  | 25.97 ± 11.47 | 37.66 ± 6.86  | 62.18 ± 8.31  | 22.76 ± 6.75 | 30.20 ± 6.93 |
| <i>Pygathrix cinerea</i>     | 9.23 | No  | Walk               | this study                                       | 2                         | 15                                       | -            | 78.12 ± 17.49 | 27.18 ± 8.41  | -             | 56.98 ± 17.26 | 25.89 ± 8.04 | -            |
| <i>Pygathrix nemaeus</i>     | 9.23 | No  | Walk               | this study                                       | 2                         | 7                                        | -            | 83.50 ± 10.73 | 30.31 ± 14.34 | -             | 62.81 ± 22.14 | 26.07 ± 8.24 | -            |
| <i>Rattus norvegicus</i>     | 0.50 | Yes | Walk, Running trot | (Fischer et al., 2002; Weijns and Dantuma, 1975) | S, E, W, H, K, A: 3; J: 5 | S, E, W: 27; H, K, A: 23; J: 16          | 16.60        | 38.00 ± 4.50  | 44.00 ± 4.83  | 92.00 ± 12.00 | 60.00 ± 5.50  | 24.00 ± 3.50 | 36.00 ± 4.33 |
| <i>Saguinus oedipus</i>      | 0.49 | No  | Walk               | (Schmidt, 2005a)                                 | 2                         | S: 27; E: 35; W: 25; H: 21; K: 25; A: 22 | -            | 51.00 ± 8.00  | 36.00 ± 6.00  | 43.00 ± 9.00  | 106.00 ± 8.00 | 38.00 ± 8.00 | 36.00 ± 9.00 |
| <i>Saimiri sciureus</i>      | 0.72 | No  | Walk               | (Schmidt, 2005b)                                 | 2                         | S: 73; E: 65; W: 45; H: 47; K: 72; A: 68 | -            | 39.00 ± 9.00  | 30.00 ± 6.00  | 50.00 ± 10.00 | 76.00 ± 9.00  | 35.00 ± 7.00 | 45.00 ± 9.00 |
| <i>Sapajus apella</i>        | 3.08 | -   | -                  | this study                                       | 3                         | 6492                                     | 18.01 ± 6.40 | -             | -             | -             | -             | -            | -            |

|                                     |       |     |                    |                           |   |                              |              |               |               |               |               |              |              |
|-------------------------------------|-------|-----|--------------------|---------------------------|---|------------------------------|--------------|---------------|---------------|---------------|---------------|--------------|--------------|
| <i>Sus scrofa</i>                   | 68.04 | -   | -                  | (Menegaz et al., 2015)    | 3 | 32                           | 13.67 ± 1.93 | -             | -             | -             | -             | -            | -            |
| <i>Tachygl ossus aculeatus</i>      | 5.00  | No  | Walk               | (Jenkins, 1971)           | R | U                            | -            | 26.57         | -             | -             | 78.30         | -            | -            |
| <i>Tenrec ecuadatus</i>             | 0.10  | -   | -                  | (Oron and Crompton, 1985) | 2 | 44                           | 17.64 ± 2.27 | -             | -             | -             | -             | -            | -            |
| <i>Trachypithecus crepusculus</i>   | 10.00 | No  | Walk               | this study                | 2 | 11                           | -            | 86.27 ± 17.85 | 33.12 ± 8.04  | -             | 64.32 ± 13.59 | 34.14 ± 7.97 | -            |
| <i>Trachypithecus delacourii</i>    | 10.00 | No  | Walk               | this study                | 2 | 6                            | -            | 75.33 ± 12.86 | 19.89 ± 10.45 | -             | 56.58 ± 3.24  | 25.92 ± 8.02 | -            |
| <i>Trachypithecus hatinheensis</i>  | 10.00 | No  | Walk               | this study                | 2 | 12                           | -            | 79.61 ± 7.89  | 23.34 ± 10.68 | -             | 57.00 ± 10.51 | 24.89 ± 9.76 | -            |
| <i>Trachypithecus poliocephalus</i> | 10.00 | No  | Walk               | this study                | 2 | 10                           | -            | 68.88 ± 7.09  | 27.45 ± 6.29  | -             | 54.06 ± 9.30  | 26.19 ± 4.41 | -            |
| <i>Tupaia glis</i>                  | 0.17  | Yes | Walk, Running trot | (Fischer et al., 2002)    | 2 | S, E, W: 28; H, K: 30; A: 29 | -            | 60.00 ± 8.17  | 70.00 ± 10.50 | 86.00 ± 16.50 | 110.00 ± 5.17 | 72.00 ± 9.33 | 88.00 ± 7.83 |

|                          |      |     |      |                              |   |    |   |               |               |               |              |              |              |
|--------------------------|------|-----|------|------------------------------|---|----|---|---------------|---------------|---------------|--------------|--------------|--------------|
| <i>Vareica variegata</i> | 3.49 | No  | Walk | this study                   | 3 | 30 | - | 68.93 ± 16.72 | 39.07 ± 10.56 | 51.91 ± 15.07 | 51.81 ± 5.76 | 33.26 ± 8.98 | 36.95 ± 9.09 |
| <i>Vulpes vulpes</i>     | 5.50 | Yes | Walk | (Jenkins and Camazine, 1977) | 1 | 6  | - | -             | -             | -             | 63.20 ± 2.90 | -            | -            |

\*Data availability often was based on differing sample sizes for each joint (J= Jaw, S = shoulder, E = Elbow, W = Wrist, H = Hip, K = Knee, A = Ankle, R = data collected from representative cycle, U = unknown).

†Data not available or not applicable

## Literature Cited in Table S1

- Ashley-Ross, M.** (1994). Hindlimb kinematics during terrestrial locomotion in a salamander (*Dicamptodon tenebrosus*). *J. Exp. Biol.* **193**, 255–283.
- Ashley-Ross, M. A., Lundin, R. and Johnson, K. L.** (2009). Kinematics of level terrestrial and underwater walking in the California newt, *Taricha torosa*. *J. Exp. Zool. Part Ecol. Genet. Physiol.* **311A**, 240–257.
- Baier, D. B. and Gatesy, S. M.** (2013). Three-dimensional skeletal kinematics of the shoulder girdle and forelimb in walking *Alligator*. *J. Anat.* **223**, 462–473.
- Bels, V. L., Davenport, J. and Delheusy, V.** (1997). Kinematic analysis of the feeding behavior in the box turtle *Terrapene carolina* (L.), (Reptilia: Emydidae). *J. Exp. Zool.* **277**, 198–212.
- Bonin, S. J., Clayton, H. M., Lanovaz, J. L. and Johnston, T.** (2007). Comparison of mandibular motion in horses chewing hay and pellets. *Equine Vet. J.* **39**, 258–262.
- Cleuren, J. and de Vree, F.** (1992). Kinematics of the jaw and hyolingual apparatus during feeding in *Caiman crocodilus*. *J. Morphol.* **212**, 141–154.
- D'Août, K., Aerts, P., De Clercq, D., De Meester, K. and Van Elsacker, L.** (2002). Segment and joint angles of hind limb during bipedal and quadrupedal walking of the bonobo (*Pan paniscus*). *Am. J. Phys. Anthropol.* **119**, 37–51.
- Davis, J. S.** (2014). Functional Morphology of Mastication in Musteloid Carnivorans.
- Dawson, M. M., Metzger, K. A., Baier, D. B. and Brainerd, E. L.** (2011). Kinematics of the quadrate bone during feeding in mallard ducks. *J. Exp. Biol.* **214**, 2036–2046.
- Delheusy, V. and Bels, V. L.** (1992). Kinematics of feeding behaviour in *Oplurus cuvieri* (Reptilia: Iguanidae). *J. Exp. Biol.* **170**, 155–186.
- Delheusy, V. and Bels, V. L.** (1999). Feeding kinematics of *Phelsuma madagascariensis* (Reptilia: gekkonidae): testing differences between iguana and scleroglossa. *J. Exp. Biol.* **202**, 3715–3730.
- Druzinsky, R. E.** (1995). Incisal biting in the mountain beaver (*Aplodontia rufa*) and woodchuck (*Marmota monax*). *J. Morphol.* **226**, 79–101.
- Elias, J. A., McBrayer, L. D. and Reilly, S. M.** (2000). Prey transport kinematics in *Tupinambis teguixin* and *Varanus exanthematicus*: conservation of feeding behavior in “chemosensory-tongued” lizards. *J. Exp. Biol.* **203**, 791–801.
- Fischer, M. S., Schilling, N., Schmidt, M., Haarhaus, D. and Witte, H.** (2002). Basic limb kinematics of small therian mammals. *J. Exp. Biol.* **205**, 1315–1338.

- Foster, K. L. and Higham, T. E.** (2012). How forelimb and hindlimb function changes with incline and perch diameter in the green anole, *Anolis carolinensis*. *J. Exp. Biol.* **215**, 2288–2300.
- Fuller, P. O., Higham, T. E. and Clark, A. J.** (2011). Posture, speed, and habitat structure: three-dimensional hindlimb kinematics of two species of padless geckos. *Zoology* **114**, 104–112.
- Herrel, A. and Vree, F. D.** (1999). Kinematics of intraoral transport and swallowing in the herbivorous lizard *Uromastix acanthinurus*. *J. Exp. Biol.* **202**, 1127–1137.
- Herrel, A., Cleuren, J. and Vree, F.** (1996). Kinematics of feeding in the lizard *Agama stellio*. *J. Exp. Biol.* **199**, 1727–1742.
- Herrel, A., Perrenoud, M., Decamps, T., Abdala, V., Manzano, A. and Pouydebat, E.** (2013). The effect of substrate diameter and incline on locomotion in an arboreal frog. *J. Exp. Biol.* **216**, 3599–3605.
- Hiemae, K. M. and Crompton, A. W.** (1971). A cinefluorographic study of feeding in the American opossum, *Didelphis marsupialis*. *Dent. Morphol. Evol.* 299–334.
- Hodson, E., Clayton, H. M. and Lanovaz, J. L.** (2000). The forelimb in walking horses: 1. Kinematics and ground reaction forces. *Equine Vet. J.* **32**, 287–294.
- Hodson, E., Clayton, H. M. and Lanovaz, J. L.** (2001). The hindlimb in walking horses: 1. Kinematics and ground reaction forces. *Equine Vet. J.* **33**, 38–43.
- Irschick, D. J. and Jayne, B. C.** (1999). Comparative three-dimensional kinematics of the hindlimb for high-speed bipedal and quadrupedal locomotion of lizards. *J. Exp. Biol.* **202**, 1047–1065.
- Janis, C. M.** (1979). Mastication in the Hyrax and its Relevance to Ungulate Dental Evolution. *Paleobiology* **5**, 50–59.
- Jenkins, F. A.** (1971). Limb posture and locomotion in the Virginia opossum (*Didelphis marsupialis*) and in other non-cursorial mammals. *J. Zool.* **165**, 303–315.
- Jenkins, F. A. and Camazine, S. M.** (1977). Hip structure and locomotion in ambulatory and cursorial carnivores. *J. Zool.* **181**, 351–370.
- Kallen, F. C. and Gans, C.** (1972). Mastication in the little brown bat, *Myotis lucifugus*. *J. Morphol.* **136**, 385–420.
- Kambic, R. E., Roberts, T. J. and Gatesy, S. M.** (2015). Guineafowl with a twist: asymmetric limb control in steady bipedal locomotion. *J. Exp. Biol.* **218**, 3836–3844.
- Kraklau, D. M.** (1991). Kinematics of prey capture and chewing in the lizard *Agama agama* (Squamata: Agamidae). *J. Morphol.* **210**, 195–212.

- Larson, S. G., Schmitt, D., Lemelin, P. and Hamrick, M.** (2001). Limb excursion during quadrupedal walking: how do primates compare to other mammals? *J. Zool.* **255**, 353–365.
- Menegaz, R. A., Baier, D. B., Metzger, K. A., Herring, S. W. and Brainerd, E. L.** (2015). XROMM analysis of tooth occlusion and temporomandibular joint kinematics during feeding in juvenile miniature pigs. *J. Exp. Biol.* **218**, 2573–2584.
- Morimoto, T., Inoue, T., Nakamura, T. and Kawamura, Y.** (1985). Characteristics of rhythmic jaw movements of the rabbit. *Arch. Oral Biol.* **30**, 673–677.
- Musinsky, C.** (2012). Condylar movement in a Pygmy Goat during Chewing.
- Nyakatura, J. A., Andrada, E., Grimm, N., Weise, H. and Fischer, M. s.** (2012). Kinematics and Center of Mass Mechanics During Terrestrial Locomotion in Northern Lapwings (*Vanellus vanellus*, Charadriiformes). *J. Exp. Zool. Part Ecol. Genet. Physiol.* **317**, 580–594.
- Oron, U. and Crompton, A. W.** (1985). A cineradiographic and electromyographic study of mastication in *Tenrec ecaudatus*. *J. Morphol.* **185**, 155–182.
- Pontzer, H., Raichlen, D. A. and Rodman, P. S.** (2014). Bipedal and quadrupedal locomotion in chimpanzees. *J. Hum. Evol.* **66**, 64–82.
- Reilly, S. M.** (2000). Locomotion in the quail (*Coturnix japonica*): the kinematics of walking and increasing speed. *J. Morphol.* **243**, 173–185.
- Reilly, S. and Delancey, M.** (1997). Sprawling locomotion in the lizard *Sceloporus clarkii*: quantitative kinematics of a walking trot. *J. Exp. Biol.* **200**, 753–765.
- Reilly, S. M. and Elias, J. A.** (1998). Locomotion in *Alligator mississippiensis*: kinematic effects of speed and posture and their relevance to the sprawling-to-erect paradigm. *J. Exp. Biol.* **201**, 2559–2574.
- Reilly, S. M. and Lauder, G. V.** (1990). The Evolution of Tetrapod Feeding Behavior: Kinematic Homologies in Prey Transport. *Evolution* **44**, 1542–1557.
- Ren, L., Butler, M., Miller, C., Paxton, H., Schwerda, D., Fischer, M. S. and Hutchinson, J. R.** (2008). The movements of limb segments and joints during locomotion in African and Asian elephants. *J. Exp. Biol.* **211**, 2735–2751.
- Rivera, A. R. V. and Blob, R. W.** (2010). Forelimb kinematics and motor patterns of the slider turtle (*Trachemys scripta*) during swimming and walking: shared and novel strategies for meeting locomotor demands of water and land. *J. Exp. Biol.* **213**, 3515–3526.
- Safayi, S., Jeffery, N. D., Shivapour, S. K., Zamanighomi, M., Zylstra, T. J., Bratsch-Prince, J., Wilson, S., Reddy, C. G., Fredericks, D. C., Gillies, G. T., et al.** (2015). Kinematic analysis of the gait of adult sheep during treadmill locomotion: Parameter



- values, allowable total error, and potential for use in evaluating spinal cord injury. *J. Neurol. Sci.* **358**, 107–112.
- Schmidt, M.** (2005a). Hind limb proportions and kinematics: are small primates different from other small mammals? *J. Exp. Biol.* **208**, 3367–3383.
- Schmidt, M.** (2005b). Quadrupedal locomotion in squirrel monkeys (Cebidae: *Saimiri sciureus*): A cineradiographic study of limb kinematics and related substrate reaction forces. *Am. J. Phys. Anthropol.* **128**, 359–370.
- Schwenk, K. and Throckmorton, G. S.** (1989). Functional and evolutionary morphology of lingual feeding in squamate reptiles: phylogenetics and kinematics. *J. Zool.* **219**, 153–175.
- Sheffield, K. M., Butcher, M. T., Shugart, S. K., Gander, J. C. and Blob, R. W.** (2011). Locomotor loading mechanics in the hindlimbs of tegu lizards (*Tupinambis merianae*): comparative and evolutionary implications. *J. Exp. Biol.* **214**, 2616–2630.
- Smith, N. C., Jespers, K. J. and Wilson, A. M.** (2010). Ontogenetic scaling of locomotor kinetics and kinematics of the ostrich (*Struthio camelus*). *J. Exp. Biol.* **213**, 1347–1355.
- So, K. K., Wainwright, P. C. and Bennett, A. F.** (1992). Kinematics of prey processing in *Chamaeleo jacksonii*: conservation of function with morphological specialization. *J. Zool.* **226**, 47–64.
- Thexton, A. J., Hiemae, K. M. and Crompton, A. W.** (1980). Food consistency and bite size as regulators of jaw movement during feeding in the cat. *J. Neurophysiol.* **44**, 456–474.
- Throckmorton, G. S. and Clarke, L. K.** (1981). Intracranial joint movements in the Agamid lizard *Amphibolurus barbatus*. *J. Exp. Zool.* **216**, 25–35.
- Verstappen, M., Aerts, P. and Van Damme, R.** (2000). Terrestrial locomotion in the black-billed magpie: kinematic analysis of walking, running and out-of-phase hopping. *J. Exp. Biol.* **203**, 2159–2170.
- Weijs, W. A. and Dantuma, R.** (1975). Electromyography and mechanics of mastication in the albino rat. *J. Morphol.* **146**, 1–33.

Table S2. Results of paired t-tests and phylogenetic paired T-tests comparing jaw joint excursion with limb joint excursions. *P*-values are adjusted using the false discovery rate. *d* = mean paired difference,  $d_{\text{phylo}}$  = mean paired phylogenetic difference. \* indicates all *p*-values were less than the reported value. Note: s.d. of 0.01 include values  $\leq 0.01$ . \*\* *p* values are significant (all  $p < 0.005$ ) after Bonferroni correction.

| Joints       | <i>d</i> | <i>t</i> | <i>df</i> | <i>p</i> ** | $d_{\text{phylo}}$ | Pagel's $\lambda$ | $\sigma^2$ | $t_{\text{phylo}}$ | $df_{\text{phylo}}$ | $p_{\text{phylo}}$ ** | <i>K</i>  |
|--------------|----------|----------|-----------|-------------|--------------------|-------------------|------------|--------------------|---------------------|-----------------------|-----------|
| Jaw-Hip      | 66.5     | 11.1     | 17        | <0.001      | 69.1±0.26          | 0.84±0.01         | 1.77±0.02  | 5.70±0.07          | 15                  | <0.001*               | 0.89±0.02 |
| Jaw-Knee     | 26.5     | 5.06     | 14        | <0.001      | 26.5±0.01          | 0.00±0.01         | 1.23±0.01  | 5.24±0.01          | 12                  | <0.001*               | 0.41±0.01 |
| Jaw-Ankle    | 32.7     | 7.25     | 14        | <0.001      | 32.7±0.01          | 0.00±0.01         | 0.91±0.01  | 7.51±0.01          | 12                  | <0.001*               | 0.24±0.01 |
| Jaw-Shoulder | 53.1     | 7.93     | 15        | <0.001      | 57.4±0.21          | 0.71±0.01         | 2.81±0.04  | 3.90±0.07          | 13                  | 0.002±0.01            | 0.56±0.01 |
| Jaw-Elbow    | 18.9     | 3.45     | 12        | 0.005       | 18.9±0.01          | 0.00±0.01         | 1.15±0.01  | 3.60±0.01          | 10                  | 0.004±0.01            | 0.49±0.02 |
| Jaw-Wrist    | 32.4     | 5.27     | 12        | 0.002       | 32.2±0.01          | 0.07±0.01         | 1.45±0.01  | 4.91±0.03          | 10                  | <0.001*               | 0.47±0.01 |

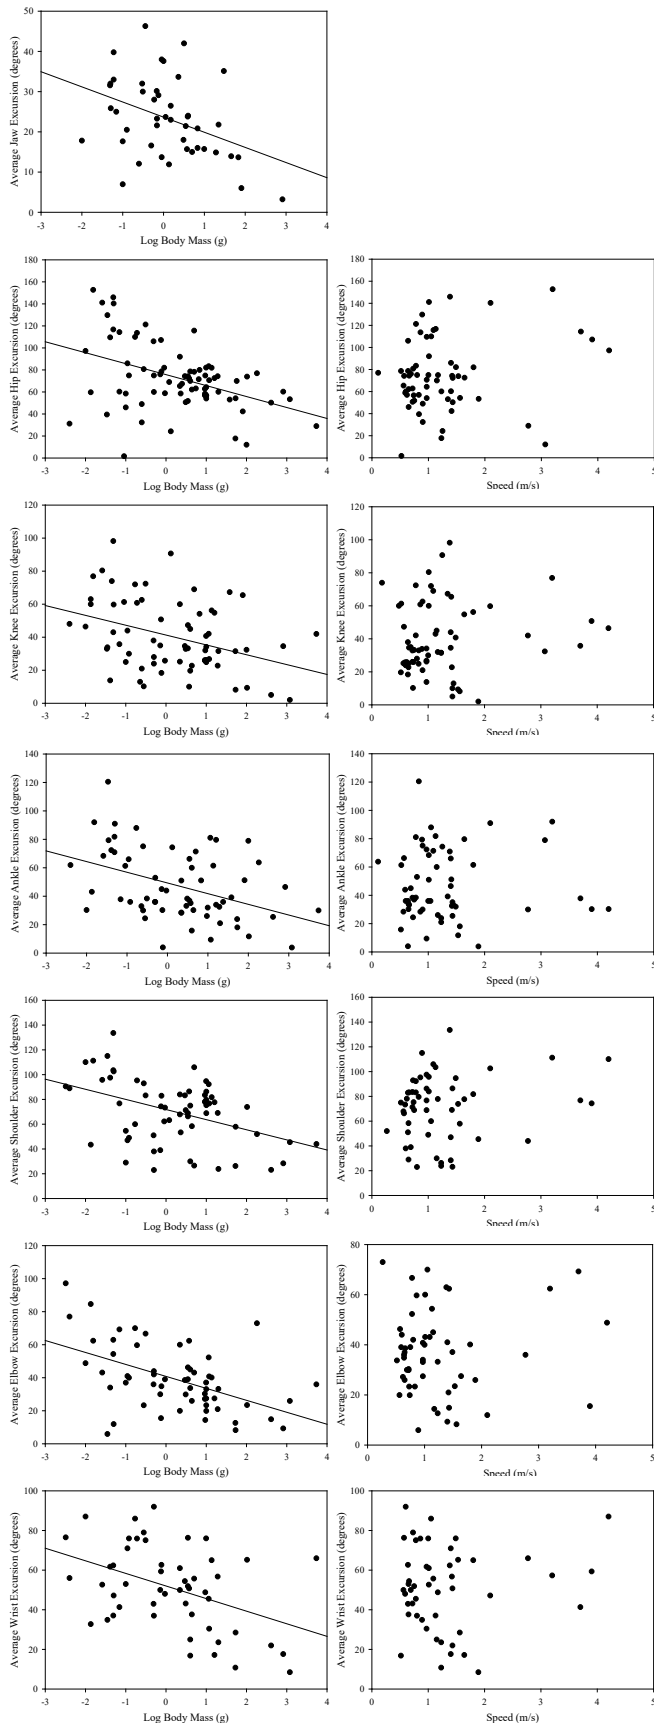

**Fig. S1. Scatterplots average joint angular excursion as a function of log-transformed body mass (g) (left panels) and speed (m/s) (right panels).** Our sample exhibited a negative correlation between angular excursions and  $\log_{10}$  body mass at all joints (all  $P \leq 0.02$ ), but there was no significant association with locomotor speed (all  $P > 0.25$ ).

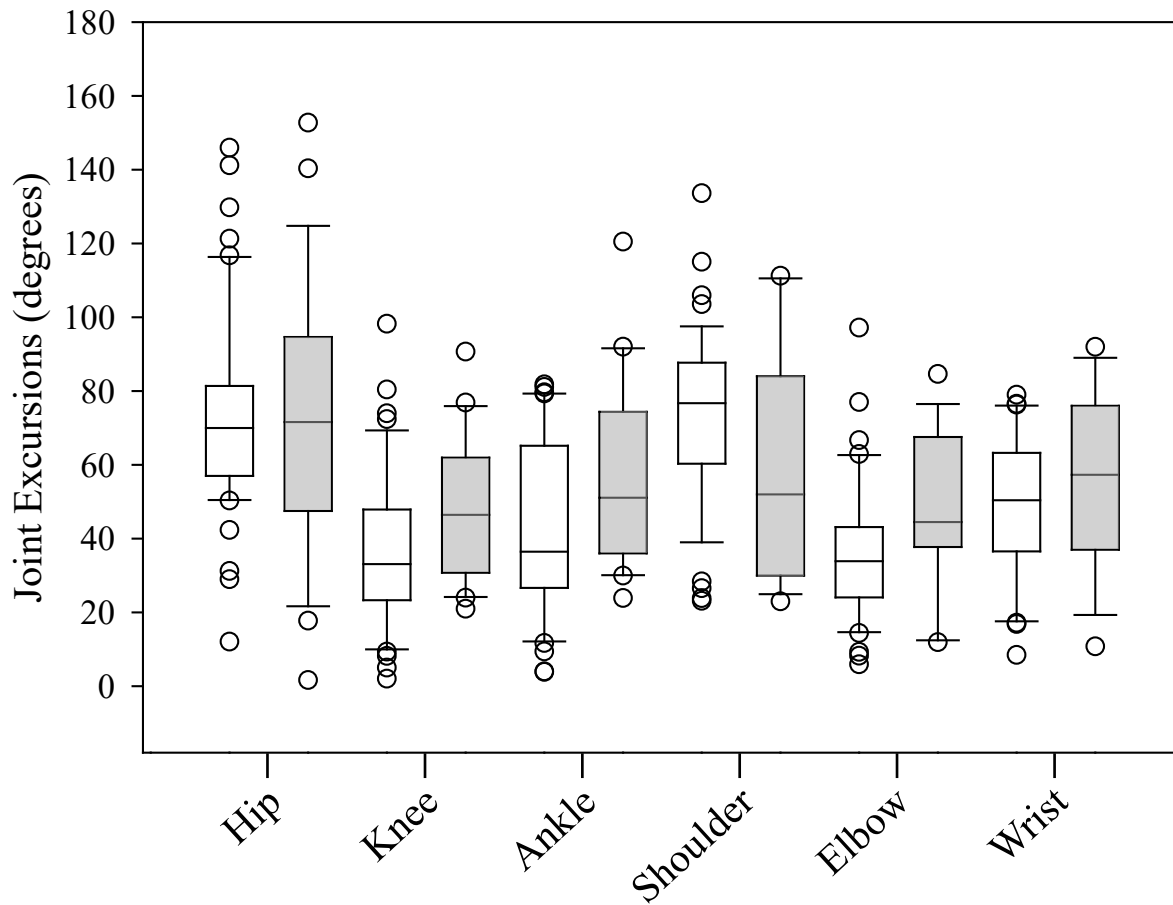

**Fig. S2. Box plots of joint angular excursions during freely moving locomotion (white) compared to locomotion on treadmills (gray).** Data plotted as median, 10th, 25th, 75th, and 90th percentiles. Open circles represent outliers in the data. Average knee angular excursion is significantly greater for animals moving on treadmills ( $P = 0.035$ ), but no other significant differences (all  $P \leq 0.051$ ) are observed.
